# Supplementary material for: Electrochemical performance of graphene and copper oxide composites synthesized from a metal–organic framework (Cu-MOF)
Source: Royal Society of Chemistry journal article supplement (doi:10.1039/c3ra43308k), 2013-01-01
Supplement: c3ra43308k.pdf [file c3ra43308k.pdf]

## Supporting Information

### Electrochemical Performance of Graphene Copper Oxide Composites Synthesized from Metal-organic Framework (Cu-MOF)

Zhengang Guo<sup>#, a</sup>, M.V. Reddy<sup>#, a</sup>, Bee Min Goh,<sup>a</sup> Angela Koh Phei San,<sup>a, b</sup> Qiaoliang Bao,<sup>a</sup> and Kian Ping Loh<sup>a\*</sup>

<sup>a</sup> Graphene Research Center, Department of Chemistry, National University of Singapore, Singapore 117542

<sup>b</sup>NUS Grad Sch for Int Sci & Eng

Corresponding Author (K. P. Loh): [chmlohkp@nus.edu.sg](mailto:chmlohkp@nus.edu.sg)

# Authors with equal contribution

1. SEM image of the few-layered G flakes after ball milled. PXRD data of graphite, Few-layer graphene flake and Cu-MOF-G (Fig S1).
2. SEM images of Cu-MOF and Cu-MOF-G (Fig S2).
3. Raman depth mapping of the Cu-MOF-G and Cu-MOF crystal (Fig S3).
4. Recovery of graphene inside the Cu-MOF-G crystal after dissolving crystal in phosphate buffer. (Fig S4).
5. TGA data showing decomposition profile of Cu-MOF, Cu-MOF-G, CuO and CuO-G. (Fig. S5 and S6).
6. FTIR spectra of Cu-MOF, Cu-MOF-G, DMTA (blue), DMTP (red) and DHTP (Fig S7 and S8, Table S1, S2 and S3).
7. Figure S9-S12, <sup>1</sup>H and <sup>13</sup>C NMR data.
8. Figure.S13: Cyclic voltammetry (CV) studies of (a) CuO-220°C, (b) CuO-G-220°C, Voltage range, 0.005-3.0V; Scan rate: 0.058mV/sec.
9. Figure S14. Cyclic voltammetry (CV) studies of Cu-MOF and discharge-charge cycling profiles, Scan rate and current rates.

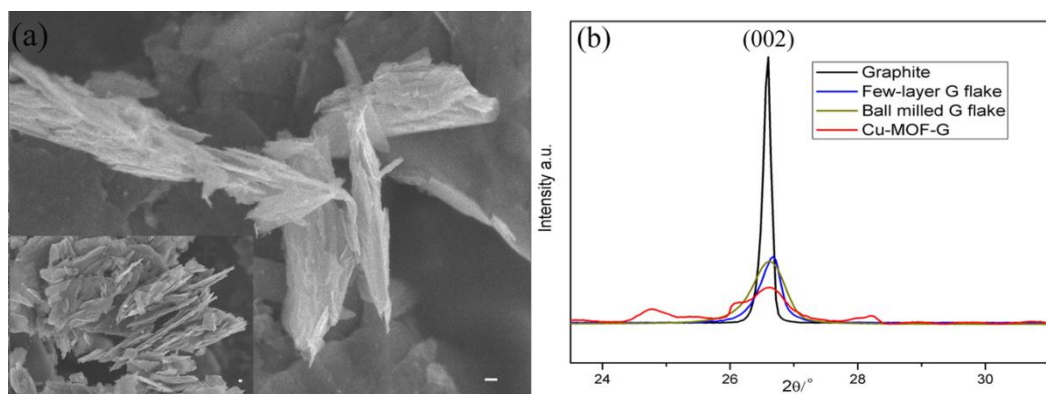

**Figure S1.** SEM image of the few-layered G flakes after ball milling (a), Scale bar, 100 nm. PXRD data of graphite (black), few-layer graphene flake (blue), ball milled graphene flake (dark yellow) and Cu-MOF-G (red). The (002) XRD peak of exfoliated few-layer graphene flake is of reduced intensity relative to graphite.

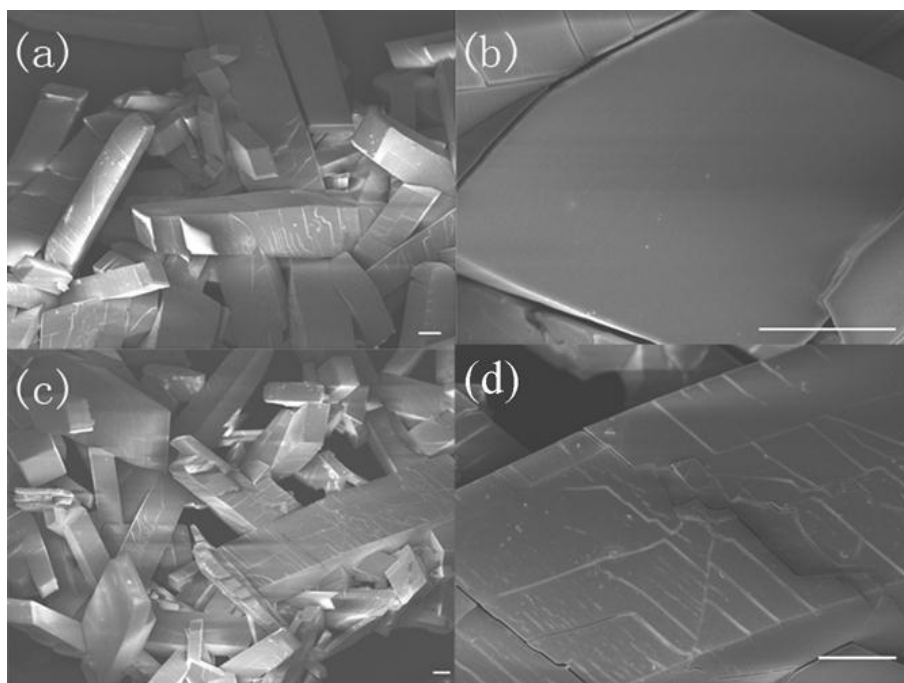

**Figure S2.** SEM images of Cu-MOF (a and b) and Cu-MOF-G (c and d). Scale bar, 10  $\mu\text{m}$ .

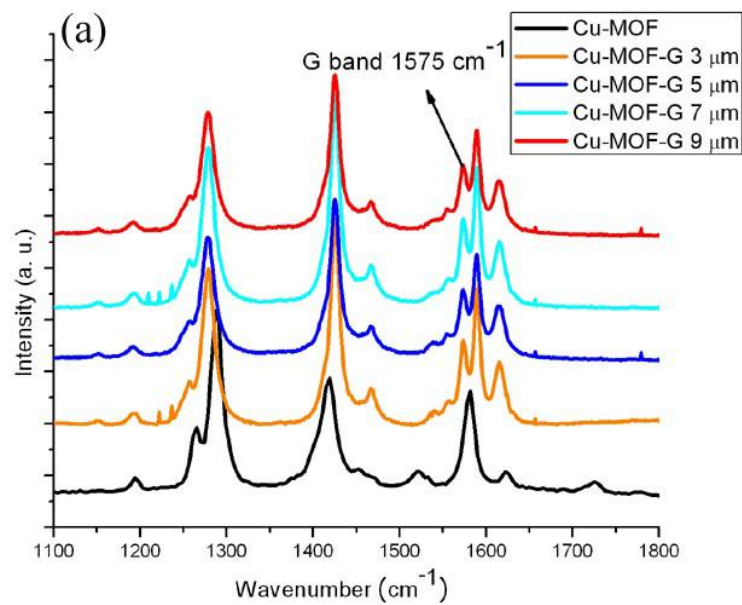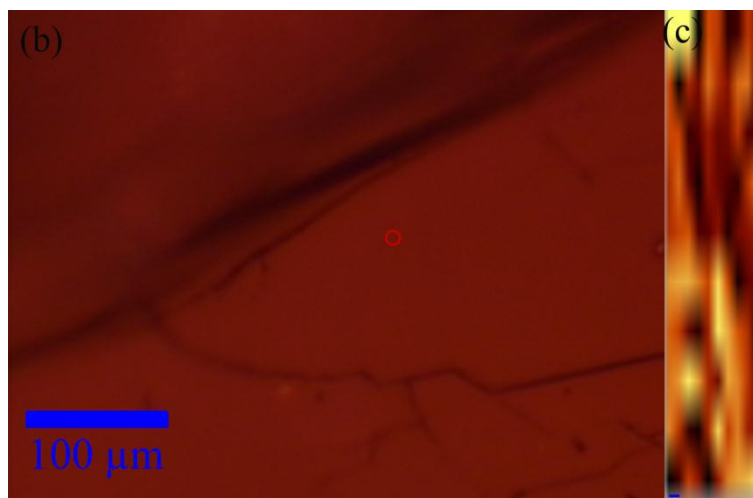

**Figure S3.** Raman depth mapping of Cu-MOF-G with G band at  $1575 \text{ cm}^{-1}$  at the depth of 3  $\mu\text{m}$ , 5  $\mu\text{m}$ , 7  $\mu\text{m}$  and 9  $\mu\text{m}$ . (a) Optical image of the depth mapping of Cu-MOF-G (b) The distribution of G inside Cu-MOF-G, the yellow areas shows the signal of G (c, scan width, 1  $\mu\text{m}$ ,

bar scale, 0.1  $\mu\text{m}$ ).

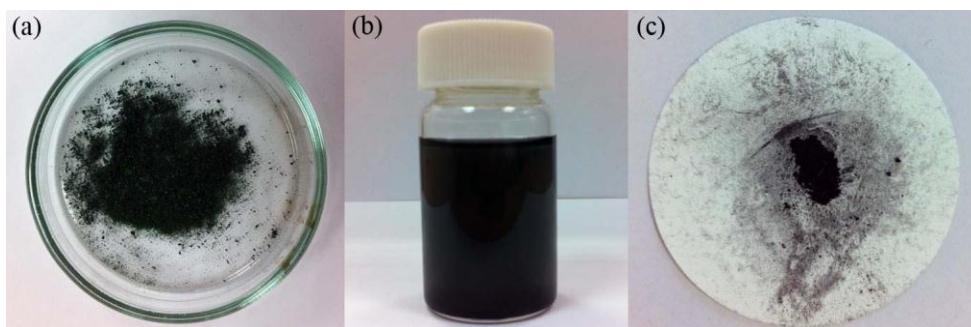

**Figure S4.** In order to get the ratio of graphene inside composites, 120mg of Cu-MOF-G crystals (a) was dissolved by phosphate buffer (b), and centrifuged. After washing with water and acetone, followed by drying in oven at 80 °C, the weight of collected graphene powder was about 5.6 mg (c). With this method, the weight ratio of graphene in Cu-MOF-G composites was calculated to be about 4.7%.

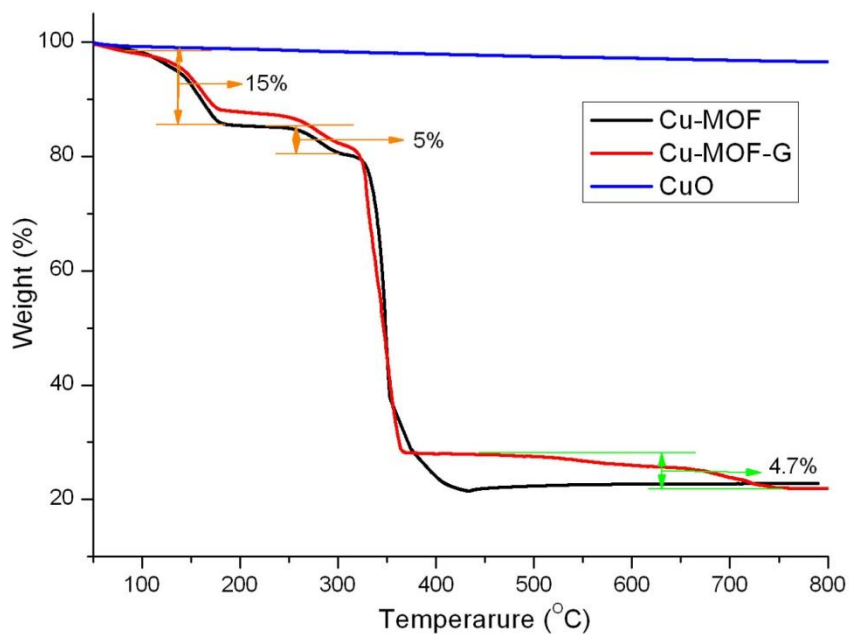

**Figure S5.** TGA data of Cu-MOF (black), Cu-MOF-G (red) and CuO (blue) synthesized from Cu-MOF at 220 °C in air.

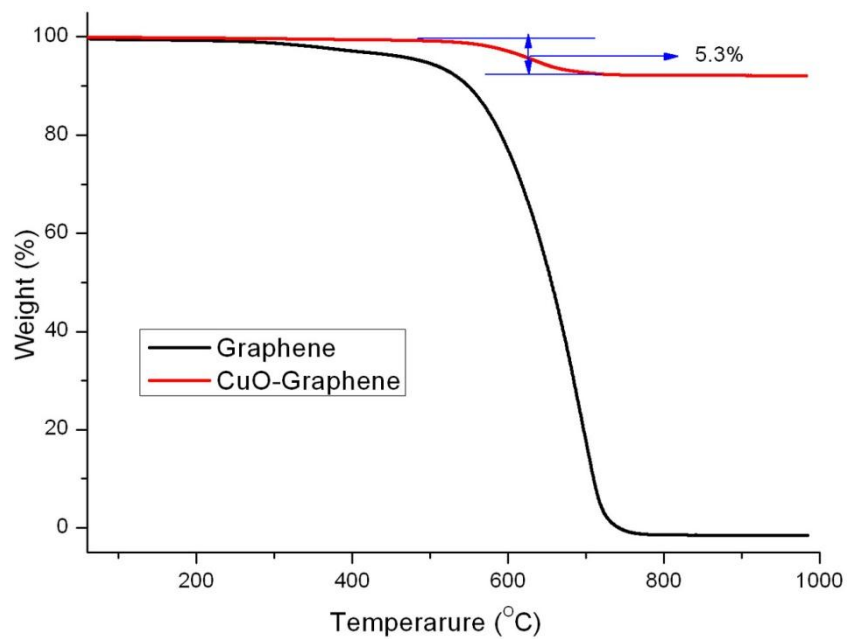

**Figure S6.** TGA data of graphene and CuO-G in air.

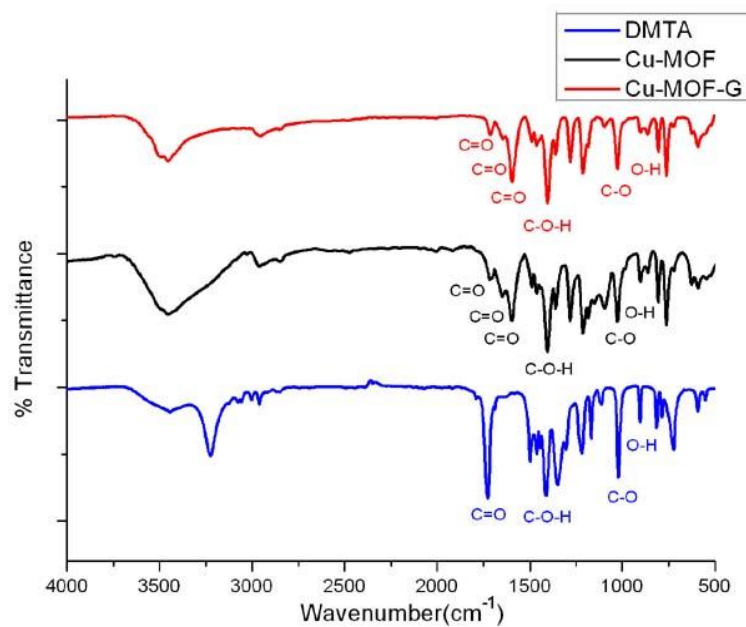

**Figure S7.** FTIR spectra of DMTA (black), Cu-MOF (ii) and after (iii) heated at 220 °C for for 2h. Cu-MOF-G before (ii) and after (iii) heated at 220 °C for 2h.

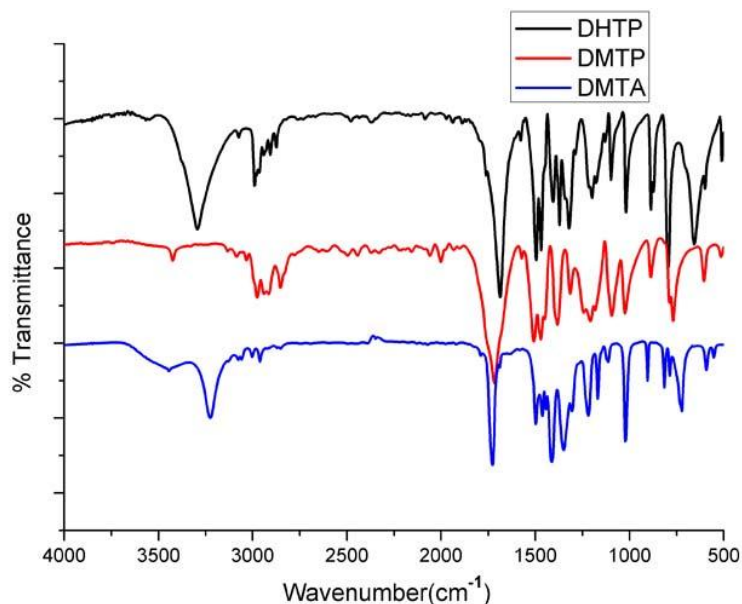

**Figure S8.** FTIR spectra of DMTA (blue), DMTP (red) and DHTP (black).

The IR spectra of Cu-MOF are shown in Fig. S7, the peak of  $1725\text{ cm}^{-1}$  is ascribed to the C=O stretch absorption of carboxyl group in DMTA, and the peaks at  $1496$ ,  $1463$  and  $1446\text{ cm}^{-1}$  are assigned to C=C stretch mode vibration of the benzene ring. The C-O-H bend in-plane mode occurs at peak of  $1415\text{ cm}^{-1}$ . The peaks of  $1220$  and  $1168\text{ cm}^{-1}$  are due to the stretching modes of C-OCH<sub>3</sub> and O-CH<sub>3</sub> groups, respectively. The C-OH stretch absorption is at  $1020\text{ cm}^{-1}$ . The vibration at  $937\text{ cm}^{-1}$  is due to O-H (hydroxyl group) bend out-of-plane mode. The observed bands are similar to those reported in literature<sup>1</sup>. After assembly to form Cu-MOF, there are three C=O absorption peaks. The peak of  $1712\text{ cm}^{-1}$  is assigned to the carbonyl group which is coordinated with the Cu(II) ions. Other carbonyl groups are from the guest DMTA molecules which are located in the one-dimensional channels by hydrogen bonds. As a result, the absorptions of  $1650$  and  $1602\text{ cm}^{-1}$  are ascribed to vibrations of hydrogen-bonded carbonyl monomer and hydrogen-bonded carbonyl dimer<sup>2</sup>.

In the FTIR data of Cu-MOF-G, the corresponding carbonyl absorptions are changed to 1716, 1646 and 1596  $\text{cm}^{-1}$  for Cu-MOF-G (Fig. S7). Other absorption assignments can be found in Table S1-S3. There are no additional peaks in Cu-MOF-G compared with Cu-MOF, which indicates that no new covalent bonds were formed during the self-assembly process after introduction of exfoliated graphene and non-covalent interactions may mediate the interactions between G and MOF.

**Table S1.** FTIR peaks assignments of DMTA.

|                       |                    |                       |                    |                       |      |
|-----------------------|--------------------|-----------------------|--------------------|-----------------------|------|
| 1791 $\text{cm}^{-1}$ | C=O                | 1725 $\text{cm}^{-1}$ | C=O                | 1496 $\text{cm}^{-1}$ | C=C  |
| 1463 $\text{cm}^{-1}$ | C=C                | 1446 $\text{cm}^{-1}$ | C=C                | 1415 $\text{cm}^{-1}$ | C-OH |
| 1220 $\text{cm}^{-1}$ | C-OCH <sub>3</sub> | 1168 $\text{cm}^{-1}$ | CO-CH <sub>3</sub> | 1020 $\text{cm}^{-1}$ | C-O  |
| 937 $\text{cm}^{-1}$  | O-H                |                       |                    |                       |      |

**Table S2.** FTIR peaks assignments of Cu-MOF.

|                       |       |                       |                    |                       |                   |
|-----------------------|-------|-----------------------|--------------------|-----------------------|-------------------|
| 1712 $\text{cm}^{-1}$ | C=O   | 1650 $\text{cm}^{-1}$ | C=O                | 1602 $\text{cm}^{-1}$ | C=O               |
| 1492 $\text{cm}^{-1}$ | C=C   | 1467 $\text{cm}^{-1}$ | C=C                | 1440 $\text{cm}^{-1}$ | C=C               |
| 1403 $\text{cm}^{-1}$ | C-O-H | 1214 $\text{cm}^{-1}$ | C-OCH <sub>3</sub> | 1184 $\text{cm}^{-1}$ | O-CH <sub>3</sub> |
| 1029 $\text{cm}^{-1}$ | C-O   | 902 $\text{cm}^{-1}$  | O-H                |                       |                   |

**Table S3.** FTIR peaks assignments of Cu-MOF-G.

|                       |                    |                       |                   |                       |       |
|-----------------------|--------------------|-----------------------|-------------------|-----------------------|-------|
| 1716 cm <sup>-1</sup> | C=O                | 1646 cm <sup>-1</sup> | C=O               | 1596 cm <sup>-1</sup> | C=O   |
| 1492 cm <sup>-1</sup> | C=C                | 1461 cm <sup>-1</sup> | C=C               | 1407 cm <sup>-1</sup> | C-O-H |
| 1211 cm <sup>-1</sup> | C-OCH <sub>3</sub> | 1180 cm <sup>-1</sup> | O-CH <sub>3</sub> | 1025 cm <sup>-1</sup> | C-O   |
| 898 cm <sup>-1</sup>  | O-H                |                       |                   |                       |       |

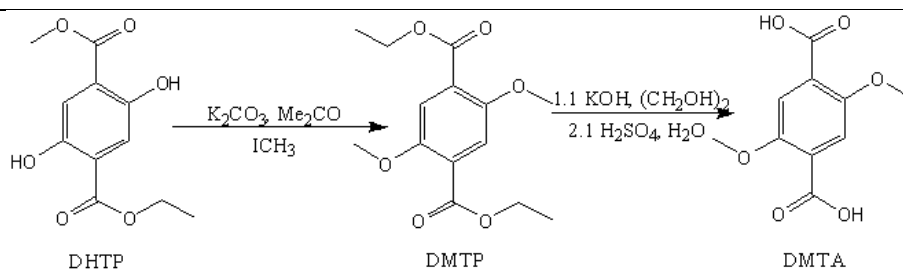

**Scheme 1.** Synthesis of DMTA (2,5-imethoxyterephthalic acid).

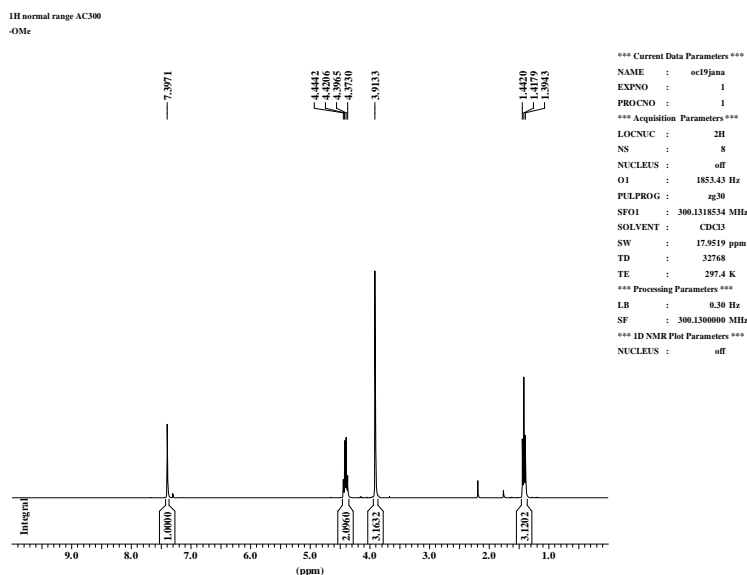



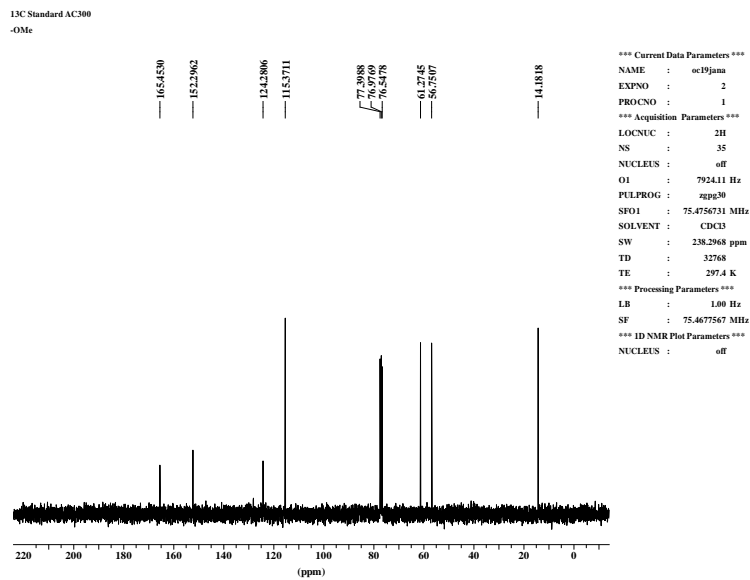

Figure S10.  $^{13}\text{C}$  NMR spectra of DMTP in  $\text{CDCl}_3$ .

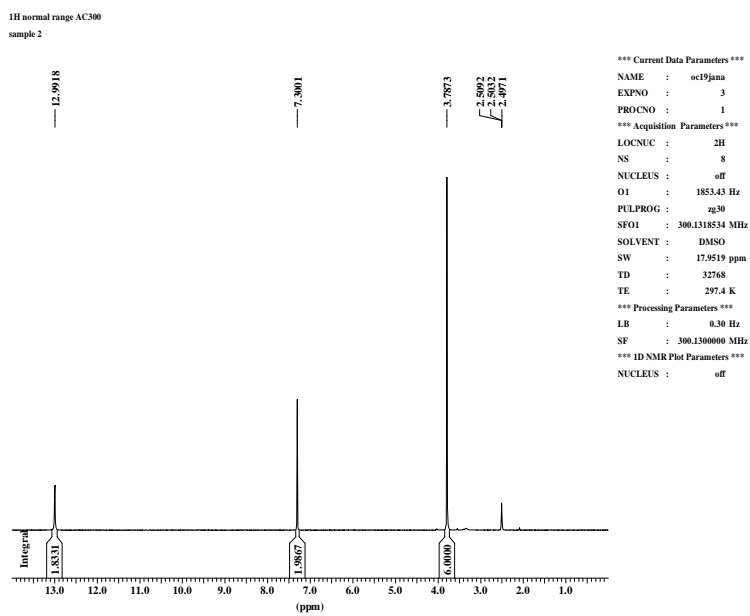

Figure S11.  $^1\text{H}$  NMR spectra of DMTA in DMSO.

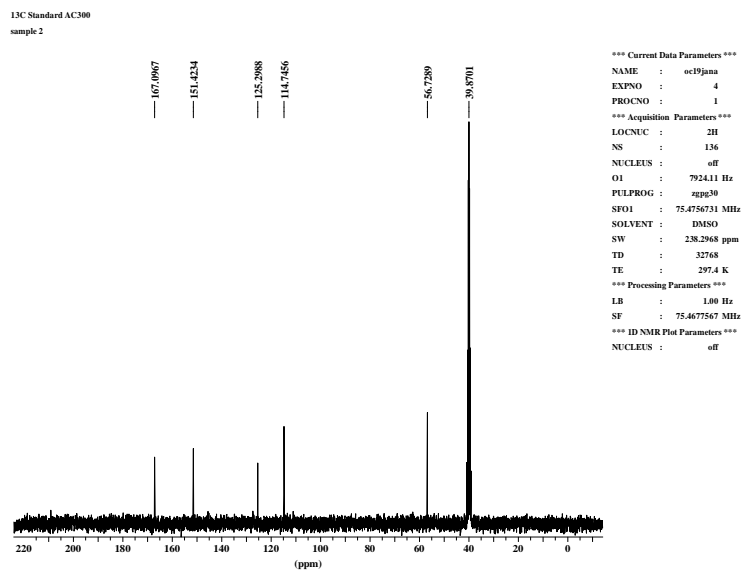

**Figure S12.**  $^{13}\text{C}$  NMR spectra of DMTA in DMSO.

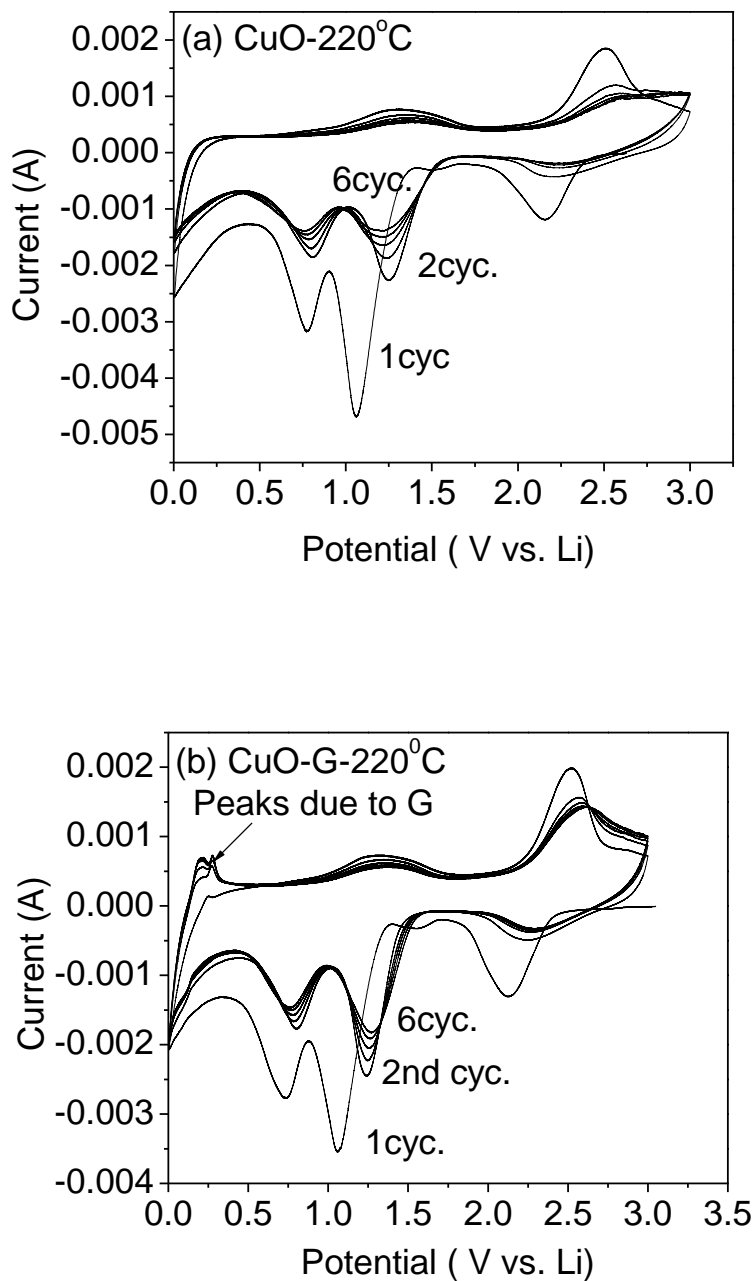

Figure S13. Cyclic voltammetry (CV) studies of (a) CuO-220°C, (b) CuO-G-220°C, Voltage range, 0.005-3.0V; Scan rate: 0.058mV/sec.

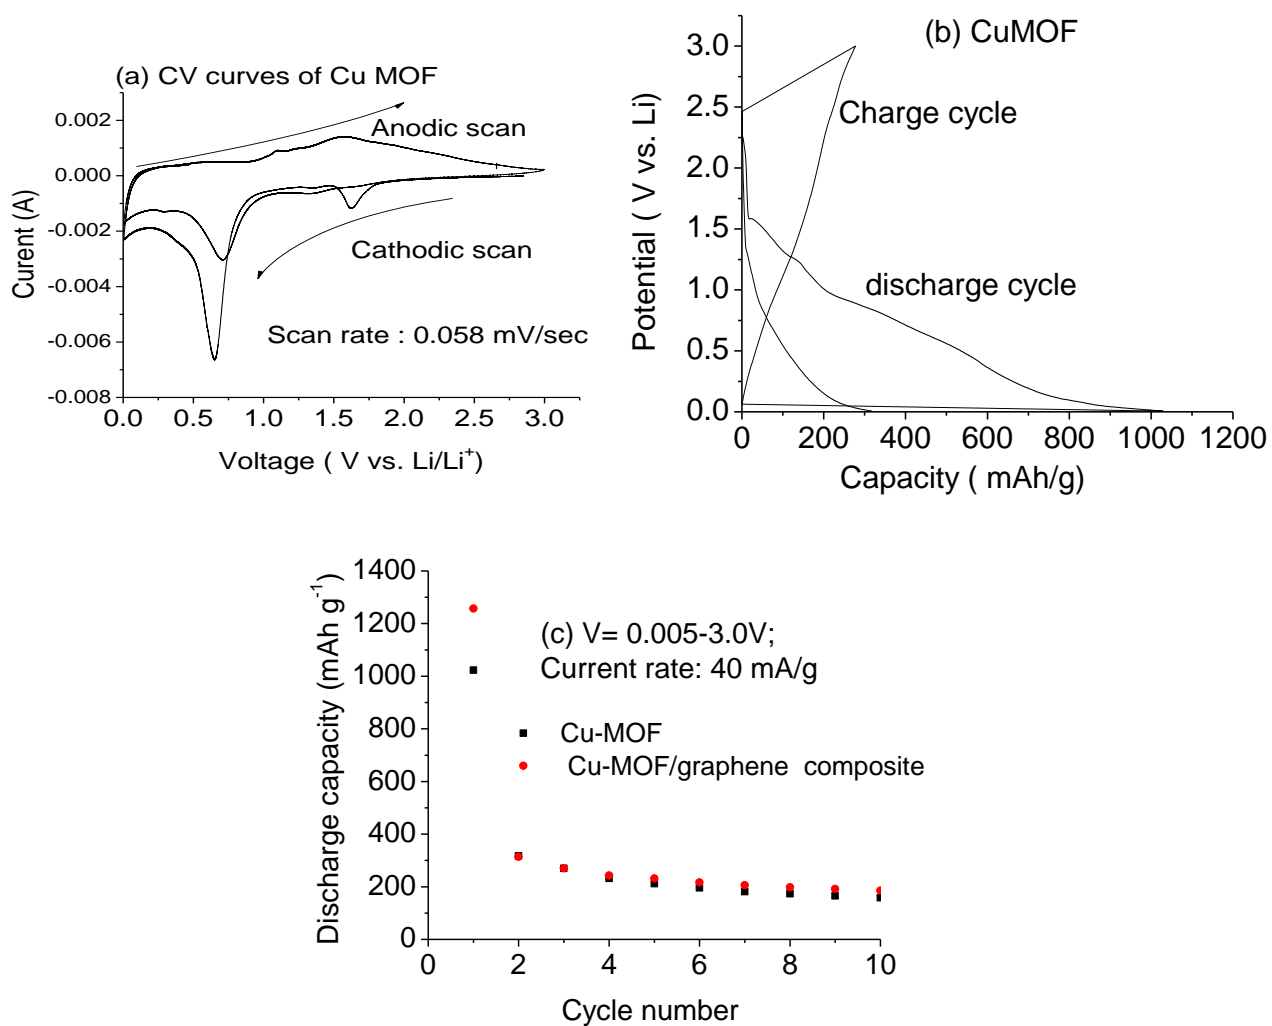

Figure S14. Cyclic voltammetry (CV) studies of Cu-MOF and discharge-charge cycling profiles, Scan rate and current rate are shown in fig.

## REFERENCES

- (1) Jiang, D. M.; Urakawa, A.; Yulikov, M.; Mallat, T.; Jeschke, G.; Baiker, A. *Chem-Eur J* **2009**, *15*, 12255.

(2) Jacob, C.; Chandra, A. K. *Spectrochim Acta A* **1981**, 37, 1071.
